# Supplementary material for: Taurine Supplementation Alleviates Puromycin Aminonucleoside Damage by Modulating Endoplasmic Reticulum Stress and Mitochondrial-Related Apoptosis in Rat Kidney
Source: MDPI journal article supplement (doi:10.3390/nu10060689), 2018-05-29
Supplement: s1 [file s1]

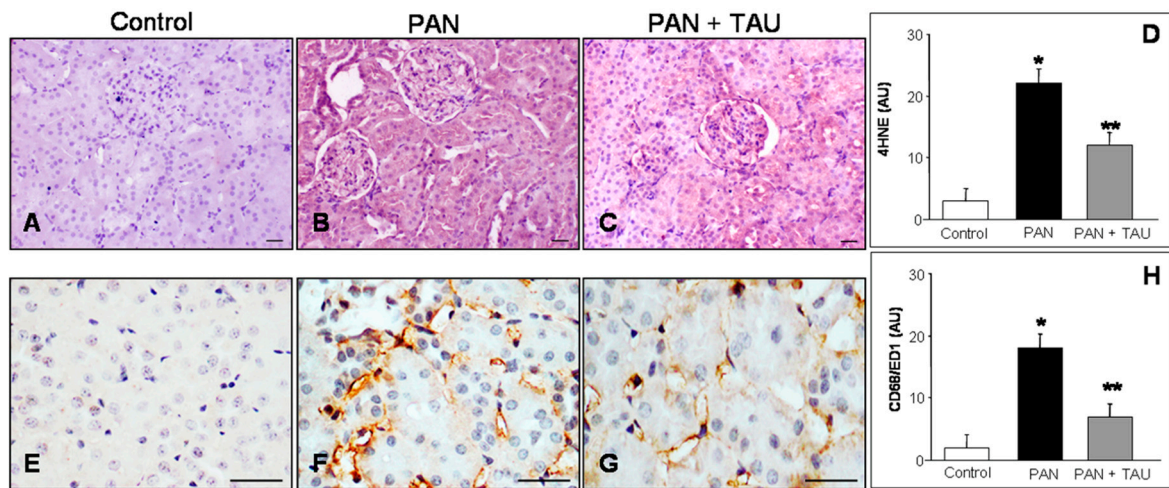

Figure S1: 4HNE and CD68/ED1 renal expression.
